# Supplementary material
Source: MDPI journal article supplement (https://www.mdpi.com/2076-3417/12/3/1000)
Supplement: s1 [file s1]

# Supplementary Materials

## Steric, activation method and solvent effects on the structure of paddlewheel diruthenium complexes

Patricia Delgado-Martínez<sup>1</sup>, Luis Moreno Martínez<sup>2</sup>, Rodrigo González-Prieto<sup>\*2</sup>, Santiago Herrero, José L. Priego<sup>2</sup>, and Reyes Jiménez-Aparicio<sup>\*2</sup>

<sup>1</sup> Centro de Asistencia a la Investigación Difracción de Rayos X, Facultad de Ciencias Químicas, Universidad Complutense de Madrid, E-28040 Madrid, Spain; patriciadelgado@ucm.es

<sup>2</sup> Departamento de Química Inorgánica, Facultad de Ciencias Químicas, Universidad Complutense de Madrid, Ciudad Universitaria, E-28040 Madrid, Spain; luis.morenomartinez@educa.madrid.org (L.M.-M.), rodgonza@ucm.es (R. G.-P.), sherrero@ucm.es (S. H.), bermejo@ucm.es (J. L. P.), reyesja@ucm.es (R. J.-A.)

\* Correspondence: reyesja@ucm.es, rodgonza@ucm.es

### X-RAY DATA

**Table S1.**  $\theta$  angles between carboxylate plane and aromatic ring plane in compounds **1b** and **1c**.

| <b>1b</b> |        | <b>1c</b> |        |
|-----------|--------|-----------|--------|
| Ru1-Ru2   | 12.73° | Ru1-Ru1   | 25.96° |
|           | 29.93° |           | 80.66° |
|           | 69.13° | Ru2-Ru2   | 15.51° |
|           | 71.73° |           | 25.46° |

**Figure S1.**  $\theta$  angles between carboxylate plane and aromatic ring plane in **1b**.

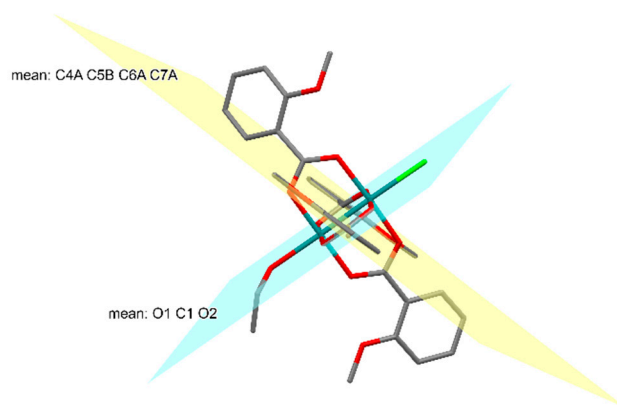

**Table S2.** Angles between aromatic ring plane and methoxy substituent plane in compounds **1b** and **1c**.

| <b>1b</b> |        | <b>1c</b> |        |
|-----------|--------|-----------|--------|
| Ru1-Ru2   | 1.80°  | Ru1-Ru1   | 3.59°  |
|           | 2.29°  |           | 10.59° |
|           | 2.34°  | Ru2-Ru2   | 4.64°  |
|           | 12.03° |           | 7.31°  |

## MAGNETIC PROPERTIES

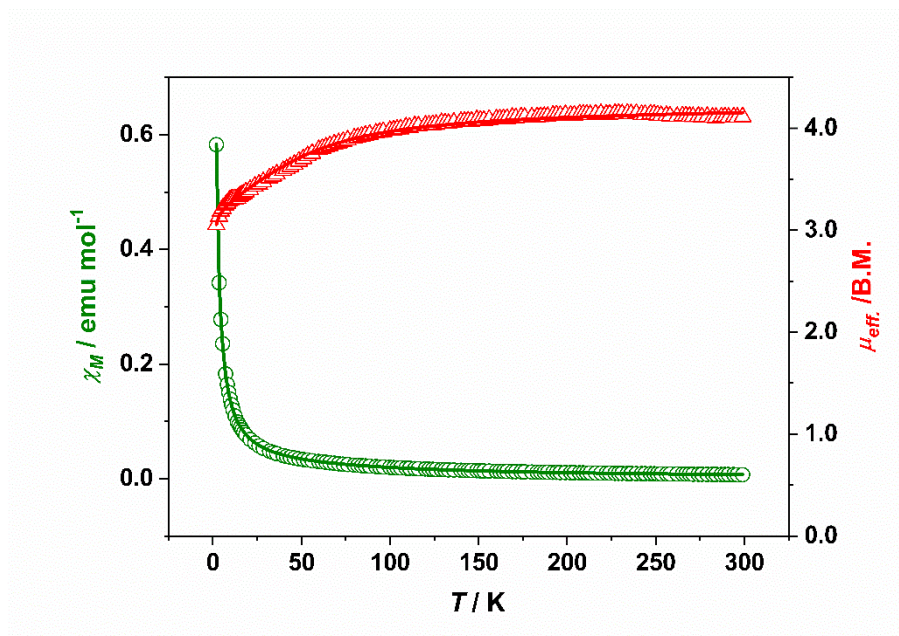

**Figure S2.** Temperature dependence of the molar susceptibility (o) and magnetic moment ( $\Delta$ ) for compound  $[\text{Ru}_2\text{Cl}(\mu\text{-O}_2\text{CC}_6\text{H}_4\text{-}m\text{-OMe})_4]_n$  (**2**). Solid lines are the product of a least-square fit of the experimental data to the model indicated in the text.

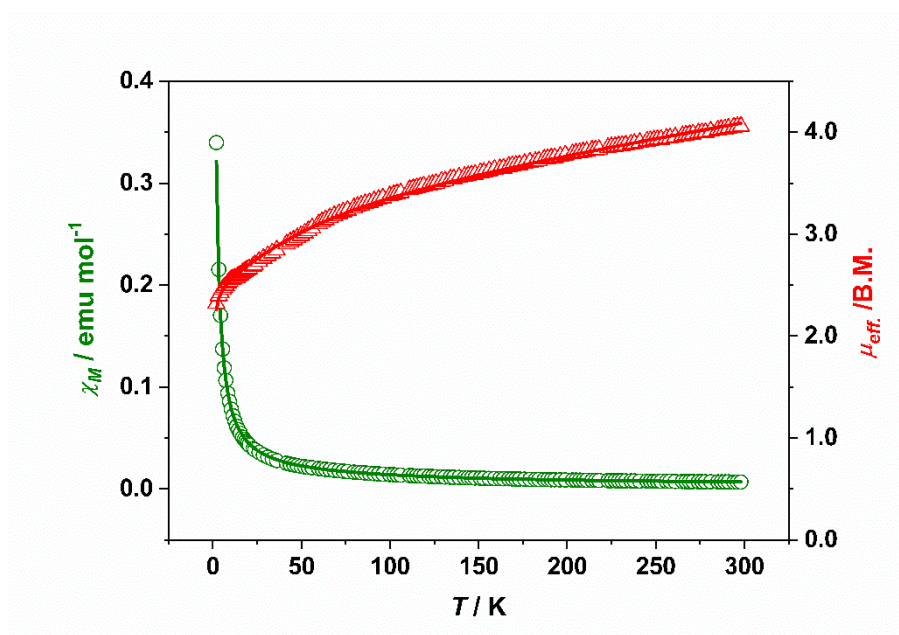

**Figure S3.** Temperature dependence of the molar susceptibility (o) and magnetic moment ( $\Delta$ ) for compound  $[\text{Ru}_2\text{Cl}(\mu\text{-O}_2\text{CC}_6\text{H}_4\text{-}p\text{-OMe})_4]_n$  (**3**). Solid lines are the product of a least-square fit of the experimental data to the model indicated in the text.

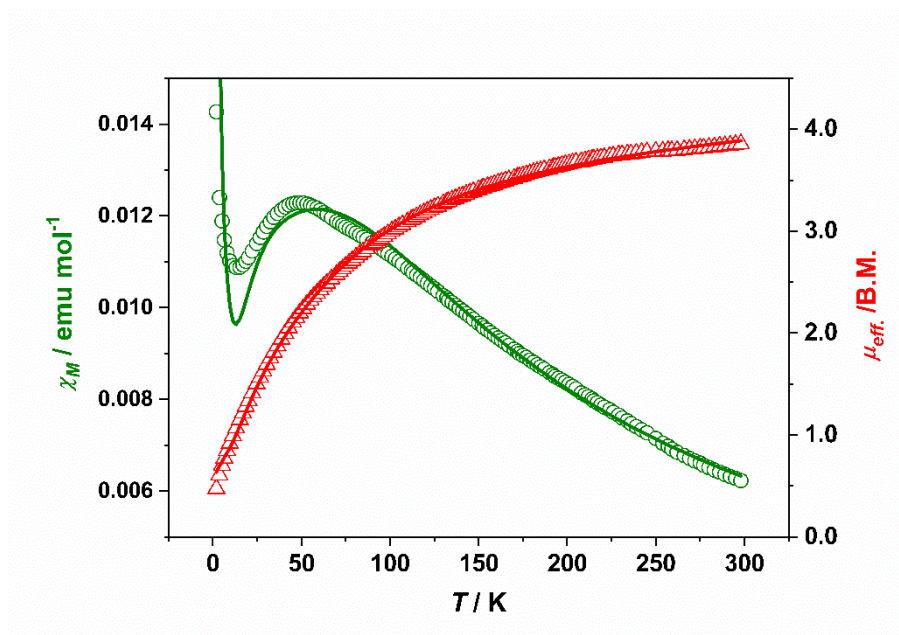

**Figure S4.** Temperature dependence of the molar susceptibility (o) and magnetic moment ( $\Delta$ ) for compound  $[\text{Ru}_2\text{Cl}(\mu\text{-O}_2\text{CC}_6\text{H}_4\text{-}o\text{-OMe})_4]_n$  (**1a**). Solid lines are the product of a least-square fit of the experimental data to the model indicated in the text and considering a Ru(III) monomer as impurity.
